# Supplementary material for: Long-read genome sequencing and variant reanalysis increase diagnostic yield in neurodevelopmental disorders
Source: HighWire-hosted journal article supplement (doi:10.1101/gr.279227.124), 2024-09-19
Supplement: Supplemental_Tables.xlsx [file Supplemental_Tables.xlsx]

## Sheet: Table of Contents
Supplemental Table S1. Proband Variant Counts and Sequencing Metrics (n=96). For each metric, the mean, median, minimum, and maximum are displayed.
Supplemental Table S2. Parent Variant Counts and Sequencing Metrics (n=20). For each metric, the mean, median, minimum, and maximum are displayed.
Supplemental Table S3. Proband Structural Variant Counts (n=96). Mean, median, minimum, and maximum of pbsv call counts are shown at various filtering criteria for population allele frequency and genomic location.
Supplemental Table S4. Repeat region loci (hg38) and allele calls from pbsv in those regions (vs. reference). For each repeat region, genomic location, gene, repeat content, repeat length, number of individuals with at least 8 reads of coverage across the genomic location, and variant length in basepairs (minimum, median, mean, 90th percentile, 95th percentile, 99th percentile, and maximum) are s…
Supplemental Table S5. Sequencing Metrics Sources. Tools and commands that used to generate sequencing quality control metrics shown in Supplemental Tables S1 and S2. For each metric, the description, algorithm, and output field name are shown.
Supplemental Table S6. Metadata of the sequencing data that will be shared via dbGaP/AnVIL via accession phs003537.v1 for 100 individuals who consented to genomic data sharing. This table contains all file identifiers that are necessary to identify the sequencing data discussed in this publication. This table does not contain any personally identifiable information (PII). Column A (sample_id) is …

## Sheet: Supplemental Table S1
Supplemental Table S1. Proband Variant Counts and Sequencing Metrics (n=96). For each metric, the mean, median, minimum, and maximum are displayed.	.	.	.	.
Metric	Mean	Median	Min	Max
Sequencing Metrics (* post/alignment)
Sequenced Bases (Gb)	82.7	80.9	53.5	131.5
Read Count	5072597	4731572	3008914	8782703
% Q20 Bases	0.97	0.99	0.93	0.99
% Q30 Bases	0.94	0.97	0.85	0.98
Mean Read Length (Sequenced)	16485	16771	11295	21412
hg38 Alignment Metrics
Mean Coverage	27.8	27.3	18.1	44.2
Median Coverage	27.4	27	18	44
Percent Covered at 1x	0.993	0.996	0.986	0.997
Percent Covered at 10x	0.976	0.978	0.951	0.99
Percent Covered at 20x	0.808	0.849	0.361	0.975
Percent Covered at 30x	0.358	0.331	0.016	0.929
Aligned Mean Read Length	15648	15916	10955	20100
Read Phasing Metrics
% Reads Phased (WhatsHap)	0.772	0.758	0.705	0.869
Median Phase Block Length	282567	131931	14524	3440858
N50 Phase Block Length	1096824	674583	37430	6163785
Small Variant Metrics (DeepVariant)
Total Small Variants	5407963	5375211	4928999	6453286
SNVs	4413217	4404564	3997350	5299670
Total InDels	994746	970031	926286	1153616
Insertions	487206	475227	445212	572169
Deletions	482005	465574	445427	568143
Complex Indels	25535	23516	20776	36408
SNV Ti/Tv Ratio	1.867	1.875	1.75	1.99
Het/Hom Ratio	1.638	1.54	1.41	2.37
SNV Het/Hom Ratio	1.56	1.47	1.34	2.25
Insertion Het/Hom Ratio	1.98	1.85	1.74	2.82
Deletion Het/Hom Ratio	1.961	1.805	1.66	2.97
Structural Variant Metrics (pbsv)*
Total Structural Variant Calls	57203.3	55586	53834	65120
Deletion	25498.4	24757	23799	29531
Duplication	3093.84	3016.5	2820	3649
Insertion	28275.5	27594	26441	32437
Inversion	121.167	121	99	155
Breakend	200.812	193	124	312
cnv	13.5938	6.5	0	53
* SV counts include events called by pbsv that are <50bp in length. SV counts are as called per-sample by pbsv and are not filtered for call quality or read support.

## Sheet: Supplemental Table S2
Supplemental Table S2. Parent Variant Counts and Sequencing Metrics (n=20)	.	.	.	.
Metric	Mean	Median	Min	Max
Sequencing Metrics (post/alignment)
Sequenced Bases (Gb)	67.6428	66.9434	44.3943	88.6703
Read Count	4.32191e+06	4232886	2904689	5974978
% Q20 Bases	0.985203	0.985938	0.980936	0.98769
% Q30 Bases	0.965588	0.967276	0.95563	0.970929
Mean Read Length (Sequenced)	15805.5	16430	12961	18408
Mean Coverage	22.822	22.5945	14.987	29.944
Median Coverage	22.4	22	15	30
Percent Covered at 1x	0.991915	0.99188	0.98782	0.99607
Percent Covered at 10x	0.961898	0.969585	0.86099	0.97801
Percent Covered at 20x	0.656254	0.674735	0.15362	0.91491
Percent Covered at 30x	0.142829	0.100116	0.0077379	0.50822
Aligned Mean Read Length	15146.9	15705.5	12508	17479
Read Phasing Metrics (n=18)*
% Reads Phased (WhatsHap)	0.779419	0.771063	0.721326	0.863833
Median Phase Block Length	298971	117710	36645	1257823
N50 Phase Block Length	909429	601919	91195	3624761
Small Variant Metrics (DeepVariant)
Total Small Variants	5.15108e+06	5010202	4930296	5975303
SNVs	4.18119e+06	4.06359e+06	3997600	4855287
Total InDels	969890	945131	914206	1120016
Insertions	472690	461210	447360	541876
Deletions	473033	463374	432171	544408
Complex Indels	24167.8	22547.5	20198	33732
SNV Ti/Tv Ratio	1.961	1.96	1.95	1.97
Het/Hom Ratio	1.7015	1.625	1.51	2.37
SNV Het/Hom Ratio	1.6275	1.555	1.45	2.25
Insertion Het/Hom Ratio	2.0035	1.915	1.78	2.79
Deletion Het/Hom Ratio	2.005	1.9	1.75	2.92
Structural Variant Metrics (pbsv)**
Total Structural Variants	57650	56199	55146	64546
Deletion	25406.7	24789	24302	29116
Duplication	3369	3294	3147	3779
Insertion	29032.3	28358.5	27718	32234
Inversion	355.45	353	335	392
Breakend	390.6	390	346	434
* n=18 on read phasing metrics due to whatshap tags that could not properly be interpreted by cramino to generate bam phasing stats for two samples
** SV counts include events called by pbsv that are <50bp in length. SV counts are as called per-sample by pbsv and are not filtered for call quality or read support.

## Sheet: Supplemental Table S3
Supplemental Table S3. Proband Structural Variant Counts (n=96). Mean, median, minimum, and maximum of pbsv call counts are shown at various filtering criteria for population allele frequency and genomic location.
	All Genomic Regions					Refseq Exons +/- 50bp
	Mean	Median	Min	Max		Mean	Median	Min	Max
No Allele Frequency Filter	56151.8	54534.5	52990	64057		2364.71	2294	2190	2772
Deletions	25019.7	24266	23417	29022		1074.6	1037	959	1278
Duplications	3030.98	2955.5	2765	3588		220.958	217	188	273
Insertions	27852.2	27170.5	25997	32035		1037.96	1008	947	1228
Inversions	116.875	116	94	151		26.7396	27	19	34
Breakends	131.979	125.5	75	214		4.44792	4	1	9
Rare (<1% in public SV databases & AC<4 cohort/internal)	2344.74	1720.5	1259	5416		116.583	87	52	281
Deletions	1297.29	933	679	3024		69.1458	51	30	174
Duplications	204.094	146	100	491		14.3229	11.5	3	38
Insertions	810.208	600.5	395	1991		32.0729	26	11	79
Inversions	4.05208	3	0	18		0.583333	0	0	4
Breakends	29.0938	26.5	9	78		0.458333	0	0	3
Exclusive (Not in public SV databases, cohort/internal AC=1)	971.542	733	477	2212		51.0938	39.5	19	128
Deletions	569.458	420	297	1279		31.7812	25	12	80
Duplications	80.9271	59	32	203		5.42708	4	0	18
Insertions	302.104	231	116	780		13.1667	11	2	34
Inversions	2.34375	1	0	13		0.4375	0	0	4
Breakends	16.7083	15	4	56		0.28125	0	0	3
Public DBs: gnomad v4 (n=63,046), HPRC GIAB pbsv calls (PacBio, n=103), HGSVC2 (n=45),
These stats are computed per sample from the Jasmine-merged sv callset, so the no allele frequency / all regions values differ slightly from counts reported in Supplemental Table S1.
* SV counts include events called by pbsv that are <50bp in length. SV counts are as called per-sample by pbsv and are not filtered for call quality or read support.

## Sheet: Supplemental Table S4
Supplemental Table S4. Repeat region loci (hg38) and allele calls from pbsv in those regions (vs. reference).
Chromosome	Repeat Start	Repeat End	Gene	Repeat	Repeat Length	Individuals with coverage >=8	Min Variant Length (bp)	Median Variant Length (bp)	Mean Variant Length (bp)	90%ile Length (bp)	95%ile Length (bp)	99%ile Length (bp)	Max Allele Length (bp)
chrX	148500631	148500691	AFF2	GCC	3	92	-24	0	2.55978	0	23.55	51.12	81
chr2	100104799	100104824	AFF3	GCC	3	96	0	0	5.875	0	46.35	78.54	270
chrX	67545316	67545385	AR	GCA	3	86	-24	0	0.244186	0	0	21.87	24
chrX	25013649	25013698	ARX	GCC	3	91	0	0	0	0	0	0	0
chr12	6936716	6936773	ATN1	CAG	3	96	-30	0	-2.40625	0	0	0	30
chr6	16327633	16327723	ATXN1	TGC	3	96	0	0	0.4375	0	0	21	21
chr22	45795354	45795424	ATXN10	ATTCT	5	96	-35	0	0.078125	0	0	20	30
chr12	111598949	111599018	ATXN2	GCT	3	96	0	0	0.109375	0	0	0	21
chr14	92071009	92071042	ATXN3	CTG	3	96	0	27	21.7344	45	54	64.08	75
chr3	63912684	63912726	ATXN7	GCA	3	96	0	0	0	0	0	0	0
chr13	70139353	70139428	ATXN8	GCA	3	96	-21	0	-1.89062	0	0	51.54	156
chrX	19990919	19990973	BCLAF3	GCC	3	77	-36	0	-0.233766	0	0	0	0
chr16	66490398	66490467	BEAN1	TGGAA	5	96	-25	20	168.839	207	466.6	4232.75	9129
chr11	66744821	66744850	C11ORF80	GCG	3	96	0	0	0	0	0	0	0
chr9	27573528	27573546	C9ORF72	GGCCCC	6	96	0	0	8.39583	30	42	69.24	108
chr19	13207858	13207897	CACNA1A	CAG	3	95	0	0	0	0	0	0	0
chr11	119206289	119206322	CBL	CGG	3	96	0	0	0.125	0	0	0	24
chr3	129172576	129172732	CNBP	CAGG	4	96	-60	-20	-13.9167	0	0	0	24
chr19	18786034	18786050	COMP	GAC	3	96	0	0	0	0	0	0	0
chr21	43776443	43776479	CSTB	CCCCGCCCCGCG	12	96	0	0	1.5625	0	0	0	300
chr12	50505001	50505022	DIP2B	CGG	3	96	0	0	8.14583	29.7	36	61.35	213
chr19	45770204	45770264	DMPK	CAG	3	96	-45	-27	-27.9479	0	0	21.27	27
chr17	80146992	80147139	EIF4A3	GCCGCTGCCGACCTCGCTGT	20	96	-58	20	12.3854	40	60	60.18	102
chrX	147912050	147912110	FMR1	GGC	3	88	-30	30	23.8182	36	36	60	69
chr3	138946020	138946063	FOXL2	GCG	3	96	0	0	0	0	0	0	0
chr10	93702522	93702547	FRA10AC1	CCG	3	96	0	0	3.02083	0	20.9	30.24	292
chr9	69037261	69037304	FXN	GAA	3	96	0	0	4.41667	19	41.35	55.27	79
chr19	14496041	14496074	GIPC1	CGG	3	96	0	0	0.25	0	0	2.16	24
chr2	190880872	190880920	GLS	GCA	3	96	-24	0	-6.875	0	0	1.89	21
chr7	27199825	27199862	HOXA13	GCC	3	96	0	0	0	0	0	0	0
chr2	176093058	176093104	HOXD13	GGC	3	96	0	0	0	0	0	0	0
chr4	3074876	3074966	HTT	CAG	3	96	-24	0	0.640625	0	0	36.27	42
chr16	87604287	87604329	JPH3	GCT	3	96	0	0	0.458333	0	0	27.09	33
chr4	21713786	21716097	KCNIP4	TAAAA	3	96	-257	-237	-160.37	0	0	149.41	459
chr8	104588972	104589000	LRP12	CGG	3	96	0	0	0.109375	0	0	0	21
chr5	10356346	10356412	MARCHF6	TTTCA	5	95	-20	0	0.184211	0	0	2.75	30
chr3	151367585	151369763	MED12	ATTTC	5	96	-110	-65	-48.8438	0	0	0	0
chr9	110700652	110702927	MUSK	TTTAT	5	96	-222	-94	-56.8073	61.1	138.75	895.02	4262
chr15	22786677	22786701	NOP56	GGGCCT	6	96	0	0	3.3125	24	24	24.54	30
chr20	2652733	2652775	NOP56	GGCCTG	6	96	0	0	3.3125	24	24	24.54	30
chr1	146228800	146228821	NOTCH2NLA	GCC	3	93	0	0	0	0	0	0	0
chr1	149390802	149390841	NOTCH2NLC	GGC	3	96	0	0	11.6146	27	31	42.27	51
chr10	79826383	79826404	NUTM2B-AS1	CGG	3	95	0	0	1.34737	0	19	19.44	24
chr14	23321472	23321490	PABPN1	GCG	3	96	0	0	0	0	0	0	0
chr4	41745972	41746032	PHOX2B	GCC	3	96	-21	0	-0.109375	0	0	0	0
chr5	146878727	146878757	PPP2R2B	GCT	3	96	0	0	1.04167	0	0	28.18	30
chr9	130681606	130681641	PRDM12	GCN	3	96	0	0	0	0	0	0	0
chr20	4699379	4699380	PRNP	GCAGCCTCATGGTGGTGGCTGGGGGCAGCCCCAT	34	96	0	0	0	0	0	0	0
chr4	159342526	159342617	RAPGEF2	TTTCA	5	96	-20	0	0.703125	0	0	25.45	40
chr4	39348424	39348479	RFC1	AAAAG	5	92	-20	0	187.489	501.7	554.4	1043.06	4714
chr6	45422750	45422802	RUNX2	GGC	3	96	0	0	0	0	0	0	0
chr8	118366815	118366919	SAMD12	AAATA	5	96	-49	0	-5.27083	0	0	1.8	20
chrX	140504316	140504362	SOX3	GGC	3	94	0	0	0	0	0	0	0
chr2	96197066	96197122	STARD7	ATTTC	5	96	0	0	17.8958	25	82.35	354	867
chr6	170561906	170562017	TBP	GCA	3	96	-21	0	-0.21875	0	0	0	0
chr18	55586155	55586227	TCF4	TGC	3	96	-39	-24	-10.4115	0	96.2	177.54	225
chrX	149631763	149631782	TMEM185A	GCC	3	92	-33	-21	-17.7717	0	0	37.02	42
chr16	24613439	24613530	TNRC6A	TTTCA	5	96	-35	-25	-23.224	0	0	0	0
chr1	1435799	1435820	TRIO	ATTTT	6	96	0	0	0.104167	0	0	0	20
chr16	17470907	17470923	VWA1	GGCGCGGAGC	10	77	0	0	0	0	0	0	0
chr3	183712187	183712223	XYLT1	CGG	3	96	0	238	234.125	264.7	271	274.54	280
chr16	72787694	72787757	YEATS2	TTTTA	5	96	0	0	28.4792	153	153	158	163
chr13	99985448	99985494	ZDHHC14	ATTTC	5	96	-35	0	-5.26042	0	0	0	0
chr7	55887601	55887640	ZFHX3	RCC	3	96	-30	0	-0.15625	0	0	0	0
chr5	14420230	14422285	ZIC2	GCG	3	96	-27	0	-0.140625	0	0	0	0
chr6	157533533	157535600	ZNF713	CGG	3	95	-94	0	0.215789	0	0	34.98	51

## Sheet: Supplemental Table S5
Supplemental Table S5. Sequencing Metrics Sources
Metric	Algorithm	Output FIeld Name	Note
Sequencing Metrics (* post/alignment)
Sequenced Bases (Gb)	sentieon --algo QualityYield	TOTAL_BASES	sentieon metrics are an implementation of Picard metrics defined here: https://broadinstitute.github.io/picard/picard-metric-definitions.html
Read Count	sentieon --algo QualityYield	TOTAL_READS
% Q20 Bases	sentieon --algo QualityYield	Q20_BASES
% Q30 Bases	sentieon --algo QualityYield	Q30_BASES
Mean Read Length (Sequenced)	sentieon --algo QualityYield	READ_LENGTH
Mean Coverage	sentieon --algo WgsMetricsAlgo	MEAN_COVERAGE
Median Coverage	sentieon --algo WgsMetricsAlgo	MEDIAN_COVERAGE
Percent Covered at 1x	sentieon --algo WgsMetricsAlgo	PCT_1X
Percent Covered at 10x	sentieon --algo WgsMetricsAlgo	PCT_10X
Percent Covered at 20x	sentieon --algo WgsMetricsAlgo	PCT_20X
Percent Covered at 30x	sentieon --algo WgsMetricsAlgo	PCT_30X
Aligned Mean Read Length	cramino	Mean Length
Read Phasing Metrics
% Reads Phased (WhatsHap)	cramino	Fraction reads phased
Median Phase Block Length	cramino	Median phaseblock length
N50 Phase Block Length		N50 Phaseblock Length
Small Variant Metrics (DeepVariant)
Total Small Variants	rtg vcfstats	Passed_Filters
SNVs	rtg vcfstats	SNPs
Total InDels	rtg vcfstats	(Passed_Filters - SNPs)
Insertions	rtg vcfstats	Insertions
Deletions	rtg vcfstats	Deletions
Complex Indels	rtg vcfstats	Indels
SNV Ti/Tv Ratio	rtg vcfstats	SNP_Transitions_Transversions
Het/Hom Ratio	rtg vcfstats	Total_Het_Hom_ratio
SNV Het/Hom Ratio	rtg vcfstats	SNP_Het_Hom_ratio
Insertion Het/Hom Ratio	rtg vcfstats	Insertion_Het_Hom_ratio
Deletion Het/Hom Ratio	rtg vcfstats	Deletion_Het_Hom_ratio
Structural Variant Metrics (pbsv)
Total Structural Variant Calls	bcftools view -H <input.vcf> | wc -l	N/A
Deletion	bcftools filter -i 'SVTYPE==DEL' <input.vcf> | wc -l	N/A
Duplication	bcftools filter -i 'SVTYPE==DUP' <input.vcf> | wc -l	N/A
Insertion	bcftools filter -i 'SVTYPE==INS' <input.vcf> | wc -l	N/A
Inversion	bcftools filter -i 'SVTYPE==INV' <input.vcf> | wc -l	N/A
Breakend	bcftools filter -i 'SVTYPE==BND' <input.vcf> | wc -l	N/A
cnv	bcftools filter -i 'SVTYPE==cnv' <input.vcf> | wc -l	N/A

## Sheet: Supplemental Table S6
Supplemental Table S6. Metadata of the sequencing data that will be shared via dbGaP/AnVIL via accession phs003537.v1 for 100 individuals who consented to genomic data sharing.
sample_id	hifi_movie_ids	original_study	table_2_entry	srGS_dbgap_id	role	phenotype	num_cells	platform	methylation	dbgap consent
HALB3032103	m64233e_210319_150348,m64233e_210328_050243,m64233e_210422_000753	CSER1 (Bowling 2017)	N/A	phs001089.v4.p1:SL93515	proband	NDD	3	Sequel II (CCS)	FALSE	TRUE
HALB3032088	m64040_220805_040341,m64017_220813_044651	CSER1 (Bowling 2017)	1	phs001089.v4.p1:SL148159	proband	NDD	2	Sequel II (CCS)	TRUE	TRUE
HALB3032105	m64234e_210319_202224,m64234e_210326_213949,m64233e_210424_163318,m64233e_210425_191635	CSER1 (Bowling 2017)	N/A	phs001089.v4.p1:SL93528	proband	NDD	4	Sequel II (CCS)	FALSE	TRUE
HALB3032109	m64233e_210519_214342,m64234e_210519_214421,m64233e_210613_070927	CSER1 (Bowling 2017)	N/A	phs001089.v4.p1:SL35196	proband	NDD	3	Sequel II (CCS)	FALSE	TRUE
HALB3031998	m84139_230926_204137_s3	PGEN	2	N/A	proband	NDD,myopathy	1	REVIO	TRUE	TRUE
HALB3032106	m64233e_210522_180349,m64234e_210522_184815	CSER1 (Bowling 2017)	N/A	phs001089.v4.p1:SL122139	proband	NDD	2	Sequel II (CCS)	FALSE	TRUE
HALB3032052	m64234e_210316_223008,m64233e_210329_140112,m64233e_210423_073359,m64234e_210422_000823,m64234e_210423_091409	CSER1 (Bowling 2017)	3	phs001089.v4.p1:SL98569	proband	NDD	5	Sequel II (CCS)	FALSE	TRUE
HALB3032117	m64017_210722_212231,m64040_210713_231503,m64040_210715_100627	SouthSeq (Bowling 2022)	N/A	phs002307.v1.p1:SL448309	proband	MCA	3	Sequel II (CCS)	FALSE	TRUE
HALB3032116	m64040_210716_210003,m64040_210718_075319	SouthSeq (Bowling 2022)	N/A	phs002307.v1.p1:SL450714	proband	MCA	2	Sequel II (CCS)	FALSE	TRUE
HALB3032069	m64109_210713_231807,m64109_210715_101255	SouthSeq (Bowling 2022)	N/A	phs002307.v1.p1:SL459448	proband	MCA	2	Sequel II (CCS)	FALSE	TRUE
HALB3032112	m64109_210716_210903,m64109_210718_080505	SouthSeq (Bowling 2022)	N/A	phs002307.v1.p1:SL460417	proband	MCA	2	Sequel II (CCS)	FALSE	TRUE
HALB3032110	m64234e_210521_083859,m64233e_210521_070710	CSER1 (Bowling 2017)	4	phs001089.v4.p1:SL39883	proband	NDD	2	Sequel II (CCS)	FALSE	TRUE
HALB3032113	m64040_210812_205532,m64040_210814_075031,m64233e_220218_220840,m64233e_220220_090320	SouthSeq (Bowling 2022)	N/A	phs002307.v1.p1:SL460414	proband	MCA	4	Sequel II (CCS)	FALSE	TRUE
HALB3032061	m54262U_210812_205757,m54262U_210814_075321,m64233e_220306_202522,m64233e_220308_072150	SouthSeq (Bowling 2022)	N/A	phs002307.v1.p1:SL466898	proband	MCA	4	Sequel II (CCS)	FALSE	TRUE
HALB3032059	m54262U_210815_185036,m54262U_210817_054806,m64109_210822_022053	SouthSeq (Bowling 2022)	N/A	phs002307.v1.p1:HALB3002718	proband	MCA	3	Sequel II (CCS)	FALSE	TRUE
HALB3032114	m54262U_210907_221515,m54262U_210909_091011	SouthSeq (Bowling 2022)	N/A	phs002307.v1.p1:HALB3003172	proband	MCA	2	Sequel II (CCS)	FALSE	TRUE
HALB3032072	m54262U_210910_184526,m54262U_210912_054155,m64233e_220303_223405,m64233e_220305_092850	CSER1 (Bowling 2017)	N/A	phs001089.v4.p1:SL138872	proband	NDD	4	Sequel II (CCS)	FALSE	TRUE
HALB3032130	m54262U_211019_031051,m64233e_211005_024652	CSER1 (Bowling 2017)	N/A	phs001089.v4.p1:SL314784	proband	NDD	2	Sequel II (CCS)	FALSE	TRUE
HALB3032131	m64109_211006_200915,m64017_211014_211634,m54262U_211029_061637	CSER1 (Bowling 2017)	N/A	phs001089.v4.p1:SL314787	proband	NDD	3	Sequel II (CCS)	FALSE	TRUE
HALB3032133	m64040_211009_065207,m64017_211005_050039	CSER1 (Bowling 2017)	N/A	phs001089.v4.p1:SL319744	proband	NDD	2	Sequel II (CCS)	FALSE	TRUE
HALB3032124	m64109_211014_210958,m64233e_211006_201401	SouthSeq (Bowling 2022)	N/A	phs002307.v1.p1:SL423164	proband	MCA	2	Sequel II (CCS)	FALSE	TRUE
HALB3032119	m54262U_211027_192136,m64040_211021_175159,m64233e_211008_071032	SouthSeq (Bowling 2022)	N/A	phs002307.v1.p1:SL447326	proband	MCA	3	Sequel II (CCS)	FALSE	TRUE
HALB3032120	m64109_211016_080510,m64233e_211009_180641	SouthSeq (Bowling 2022)	N/A	phs002307.v1.p1:SL448306	proband	MCA	2	Sequel II (CCS)	FALSE	TRUE
HALB3032123	m54262U_211014_211349,m64109_211008_070443	SouthSeq (Bowling 2022)	N/A	phs002307.v1.p1:SL448313	proband	MCA	2	Sequel II (CCS)	FALSE	TRUE
HALB3032122	m64017_211016_081238,m64233e_211011_050253	SouthSeq (Bowling 2022)	N/A	phs002307.v1.p1:SL450257	proband	MCA	2	Sequel II (CCS)	FALSE	TRUE
HALB3032128	m54262U_211016_080835,m64109_211009_180244	SouthSeq (Bowling 2022)	N/A	phs002307.v1.p1:SL457314	proband	MCA	2	Sequel II (CCS)	FALSE	TRUE
HALB3032121	m54262U_211017_173813,m64109_211011_050005	SouthSeq (Bowling 2022)	N/A	phs002307.v1.p1:SL463492	proband	MCA	2	Sequel II (CCS)	FALSE	TRUE
HALB3032129	m64233e_211022_072717,m64233e_211027_192302,m64233e_211003_174227	CSER1 (Bowling 2017)	N/A	phs001089.v4.p1:SL313822	proband	NDD	3	Sequel II (CCS)	FALSE	TRUE
HALB3032118	m64103_211208_235544,m64103_211210_105154	SouthSeq (Bowling 2022)	N/A	phs002307.v1.p1:SL457324	proband	MCA	2	Sequel II (CCS)	FALSE	TRUE
HALB3032127	m64103_211211_215015,m64103_211213_084830	SouthSeq (Bowling 2022)	N/A	phs002307.v1.p1:SL463495	proband	MCA	2	Sequel II (CCS)	FALSE	TRUE
HALB3032086	m54262U_211120_000352,m54262U_211121_105818,m54262U_211130_213534	CSER1 (Bowling 2017)	N/A	phs001089.v4.p1:SL219162	proband	NDD	3	Sequel II (CCS)	FALSE	TRUE
HALB3032075	m54262U_211122_215458,m54262U_211124_085133	CSER1 (Bowling 2017)	N/A	phs001089.v4.p1:SL236285	proband	NDD	2	Sequel II (CCS)	FALSE	TRUE
HALB3032058	m64234e_211217_235225,m64234e_211219_104640,m54262U_220107_090339	CSER1 (Bowling 2017)	4	phs001089.v4.p1:SL39885	mother	N/A	3	Sequel II (CCS)	FALSE	TRUE
HALB3032057	m64234e_211220_214242,m64234e_211222_083849,m54262U_220108_195913	CSER1 (Bowling 2017)	4	phs001089.v4.p1:SL39884	father	N/A	3	Sequel II (CCS)	FALSE	TRUE
HALB3032080	m64040_211120_000427,m64040_211121_105919	CSER1 (Bowling 2017)	N/A	phs001089.v4.p1:SL262926	proband	NDD	2	Sequel II (CCS)	FALSE	TRUE
HALB3032085	m64040_211122_215927,m64040_211124_085747,m54262U_211203_192732	CSER1 (Bowling 2017)	N/A	phs001089.v4.p1:SL266338	proband	NDD	3	Sequel II (CCS)	FALSE	TRUE
HALB3032081	m64017_211120_000657,m64017_211121_110222	CSER1 (Bowling 2017)	N/A	phs001089.v4.p1:SL293672	proband	NDD	2	Sequel II (CCS)	FALSE	TRUE
HALB3027064	m84053_230420_202115_s1	SouthSeq (Bowling 2022)	5	phs002307.v1.p1:SL398103	proband	NDD,myopathy	1	REVIO	TRUE	TRUE
HALB3032073	m54262U_211214_235441,m54262U_211216_104946	CSER1 (Bowling 2017)	N/A	phs001089.v4.p1:SL138873	father	N/A	2	Sequel II (CCS)	FALSE	TRUE
HALB3032074	m54262U_211217_214659,m54262U_211219_084429	CSER1 (Bowling 2017)	N/A	phs001089.v4.p1:SL138874	mother	N/A	2	Sequel II (CCS)	FALSE	TRUE
HALB3032056	m64040_211217_234646,m64040_211219_104145	CSER1 (Bowling 2017)	N/A	phs001089.v4.p1:SL35198	mother	N/A	2	Sequel II (CCS)	FALSE	TRUE
HALB3032055	m64040_211220_205429,m64040_211222_075149	CSER1 (Bowling 2017)	N/A	phs001089.v4.p1:SL35197	father	N/A	2	Sequel II (CCS)	FALSE	TRUE
HALB3032051	m64233e_211218_002821,m54262U_220105_220849,m64103_220129_095249	CSER1 (Bowling 2017)	N/A	phs001089.v4.p1:SL93517	mother	N/A	3	Sequel II (CCS)	FALSE	TRUE
HALB3032050	m64233e_211219_112430,m64233e_211220_222035	CSER1 (Bowling 2017)	N/A	phs001089.v4.p1:SL93516	father	N/A	2	Sequel II (CCS)	FALSE	TRUE
HALB3032111	m64233e_210716_211414,m64233e_210718_081054	SouthSeq (Bowling 2022)	6	phs002307.v1.p1:HALB3003020	proband	MCA	2	Sequel II (CCS)	FALSE	TRUE
HALB3032083	m64040_211208_231949,m64103_211217_080827	CSER1 (Bowling 2017)	7	phs001089.v4.p1:SL261831	proband	NDD	2	Sequel II (CCS)	FALSE	TRUE
HALB3032054	m64103_220105_220850,m64103_220107_090355	CSER1 (Bowling 2017)	N/A	phs001089.v4.p1:SL93530	mother	N/A	2	Sequel II (CCS)	FALSE	TRUE
HALB3032053	m64103_220113_224939,m64103_220108_200008,m64103_220110_052621	CSER1 (Bowling 2017)	N/A	phs001089.v4.p1:SL93529	father	N/A	3	Sequel II (CCS)	FALSE	TRUE
HALB3032126	m64103_220210_091600,m64233e_220127_011252,m64233e_220128_120739	SouthSeq (Bowling 2022)	N/A	phs002307.v1.p1:SL423165	mother	N/A	3	Sequel II (CCS)	FALSE	TRUE
HALB3032125	m64103_220211_201321,m64233e_220129_230624,m64233e_220131_100256	SouthSeq (Bowling 2022)	N/A	phs002307.v1.p1:SL423166	father	N/A	3	Sequel II (CCS)	FALSE	TRUE
HALB3032065	m64103_220119_002856,m64103_220120_112334	SouthSeq (Bowling 2022)	N/A	phs002307.v1.p1:SL460415	mother	N/A	2	Sequel II (CCS)	FALSE	TRUE
HALB3032064	m64103_220121_210020,m64103_220123_083631	SouthSeq (Bowling 2022)	N/A	phs002307.v1.p1:SL460416	father	N/A	2	Sequel II (CCS)	FALSE	TRUE
HALB3032071	m64040_220119_003116,m64040_220120_112612	SouthSeq (Bowling 2022)	N/A	phs002307.v1.p1:SL448310	mother	N/A	2	Sequel II (CCS)	FALSE	TRUE
HALB3032070	m64040_220121_222316,m64040_220123_092035	SouthSeq (Bowling 2022)	N/A	phs002307.v1.p1:SL448311	father	N/A	2	Sequel II (CCS)	FALSE	TRUE
HALB3032063	m64040_220127_011252,m64040_220128_120743	SouthSeq (Bowling 2022)	N/A	phs002307.v1.p1:SL466899	mother	N/A	2	Sequel II (CCS)	FALSE	TRUE
HALB3032062	m64040_220129_230530,m64040_220131_100255,m64103_220213_070959	SouthSeq (Bowling 2022)	N/A	phs002307.v1.p1:SL466900	father	N/A	3	Sequel II (CCS)	FALSE	TRUE
HALB3032076	m64234e_220325_062705,m64234e_220330_222258,m64234e_220407_204910	CSER1 (Bowling 2017)	N/A	phs001089.v4.p1:SL237786	proband	NDD	3	Sequel II (CCS)	FALSE	TRUE
HALB3032077	m64234e_220326_155812,m64234e_220401_091925,m64234e_220409_074421	CSER1 (Bowling 2017)	N/A	phs001089.v4.p1:SL244907	proband	NDD	3	Sequel II (CCS)	FALSE	TRUE
HALB3032078	m64234e_220328_012612,m64234e_220402_201512,m64234e_220410_184414	CSER1 (Bowling 2017)	N/A	phs001089.v4.p1:SL261828	proband	NDD	3	Sequel II (CCS)	FALSE	TRUE
HALB3032079	m64234e_220412_054031,m64234e_220418_204458	CSER1 (Bowling 2017)	N/A	phs001089.v4.p1:SL261834	proband	NDD	2	Sequel II (CCS)	FALSE	TRUE
HALB3032087	m64040_220803_183645,m64017_220811_175151	CSER1 (Bowling 2017)	N/A	phs001089.v4.p1:SL148151	proband	NDD	2	Sequel II (CCS)	TRUE	TRUE
HALB3032082	m64109_211120_000400,m64109_211121_110011	CSER1 (Bowling 2017)	8	phs001089.v4.p1:SL249507	proband	NDD	2	Sequel II (CCS)	FALSE	TRUE
HALB3032091	m64040_220806_133622,m64017_220814_141551	CSER1 (Bowling 2017)	N/A	phs001089.v4.p1:SL156690	proband	NDD	2	Sequel II (CCS)	TRUE	TRUE
HALB3032092	m64040_220808_003316,m64017_220815_234509	CSER1 (Bowling 2017)	N/A	phs001089.v4.p1:SL159227	proband	NDD	2	Sequel II (CCS)	TRUE	TRUE
HALB3032093	m64017_220818_190937,m64109_220825_195238	CSER1 (Bowling 2017)	N/A	phs001089.v4.p1:SL159970	proband	NDD	2	Sequel II (CCS)	TRUE	TRUE
HALB3032094	m64017_220820_060510,m64109_220827_064745	CSER1 (Bowling 2017)	N/A	phs001089.v4.p1:SL159973	proband	NDD	2	Sequel II (CCS)	TRUE	TRUE
HALB3032089	m64233e_220811_201413,m64040_220818_190949	CSER1 (Bowling 2017)	N/A	phs001089.v4.p1:SL150146	proband	NDD	2	Sequel II (CCS)	TRUE	TRUE
HALB3032084	m64109_211122_215952,m64109_211124_085901,m54262U_211202_083031	CSER1 (Bowling 2017)	9	phs001089.v4.p1:SL262288	proband	NDD	3	Sequel II (CCS)	FALSE	TRUE
HALB3032095	m64233e_220814_164537,m64040_220821_170323	CSER1 (Bowling 2017)	N/A	phs001089.v4.p1:SL202086	proband	NDD	2	Sequel II (CCS)	TRUE	TRUE
HALB3031999	m84053_231004_160940_s3	SouthSeq (Bowling 2022)	10	phs002307.v1.p1:HALB3004665	proband	NDD,myopathy	1	REVIO	TRUE	TRUE
HALB3032097	m54262U_220811_201846,m64233e_220818_191052	CSER1 (Bowling 2017)	N/A	phs001089.v4.p1:SL202099	proband	NDD	2	Sequel II (CCS)	TRUE	TRUE
HALB3032098	m54262U_220813_055454,m64233e_220820_060536	CSER1 (Bowling 2017)	N/A	phs001089.v4.p1:SL237783	proband	NDD	2	Sequel II (CCS)	TRUE	TRUE
HALB3032099	m54262U_220825_192554,m64233e_220901_165256	CSER1 (Bowling 2017)	N/A	phs001089.v4.p1:SL330401	proband	NDD	2	Sequel II (CCS)	FALSE	TRUE
HALB3032100	m54262U_220827_062102,m64233e_220903_034806	CSER1 (Bowling 2017)	N/A	phs001089.v4.p1:SL293675	proband	NDD	2	Sequel II (CCS)	FALSE	TRUE
HALB3032101	m64109_220908_203629,m64017_220915_175508	CSER1 (Bowling 2017)	11	phs001089.v4.p1:SL299908	proband	NDD	2	Sequel II (CCS)	FALSE	TRUE
HALB3032102	m64109_220910_073237,m64017_220916_235506,m64017_220924_070625	CSER1 (Bowling 2017)	N/A	phs001089.v4.p1:SL303724	proband	NDD	3	Sequel II (CCS)	FALSE	TRUE
HALB3027060	m84053_230419_201134_s1	CSER1 (Bowling 2017)	N/A	phs001089.v4.p1:SL126161	proband	NDD,myopathy	1	REVIO	TRUE	TRUE
HALB3027061	m84053_230419_204158_s2	CSER1 (Bowling 2017)	N/A	phs001089.v4.p1:SL139999	proband	NDD,myopathy	1	REVIO	TRUE	TRUE
HALB3027062	m84053_230419_211305_s3	CSER1 (Bowling 2017)	12	phs001089.v4.p1:SL143104	proband	NDD,myopathy	1	REVIO	TRUE	TRUE
HALB3027063	m84053_230419_214411_s4	CSER1 (Bowling 2017)	N/A	phs001089.v4.p1:SL209152	proband	NDD,myopathy	1	REVIO	TRUE	TRUE
HALB3032090	m64233e_220813_070834,m64040_220820_060536	CSER1 (Bowling 2017)	13	phs001089.v4.p1:SL153435	proband	NDD	2	Sequel II (CCS)	TRUE	TRUE
HALB3027065	m84053_230420_205221_s2	SouthSeq (Bowling 2022)	N/A	phs002307.v1.p1:SL439600	proband	NDD,myopathy	1	REVIO	TRUE	TRUE
HALB3027066	m84053_230420_212327_s3	SouthSeq (Bowling 2022)	N/A	phs002307.v1.p1:SL400765	proband	NDD,myopathy	1	REVIO	TRUE	TRUE
HALB3027069	m84053_230426_195903_s1,m84053_230505_200703_s3.hifi_reads.bc2019	AGHI (East 2021)	N/A	N/A	proband	NDD,myopathy	2	REVIO	TRUE	TRUE
HALB3027071	m84053_230426_210031_s3,m84053_230505_200703_s3.hifi_reads.bc2021	AGHI (East 2021)	N/A	N/A	proband	myopathy	2	REVIO	TRUE	TRUE
HALB3027073	m84053_230427_200848_s1	AGHI (East 2021)	N/A	N/A	proband	myopathy	1	REVIO	TRUE	TRUE
HALB3027074	m84053_230427_203954_s2	AGHI (East 2021)	N/A	N/A	proband	myopathy	1	REVIO	TRUE	TRUE
HALB3027068	m84053_230427_214206_s4,m84053_230505_200703_s3.hifi_reads.bc2026	SouthSeq (Bowling 2022)	N/A	phs002307.v1.p1:SL431911	proband	NDD,myopathy	2	REVIO	TRUE	TRUE
HALB3031994	m84053_230919_205307_s3	CSER1 (Bowling 2017)	N/A	phs001089.v4.p1:SL146340	proband	NDD,myopathy	1	REVIO	TRUE	TRUE
HALB3031995	m84053_230919_212413_s4	CSER1 (Bowling 2017)	N/A	phs001089.v4.p1:SL146346	proband	NDD,myopathy	1	REVIO	TRUE	TRUE
HALB3032096	m64233e_220816_022635,m64040_220823_040116	CSER1 (Bowling 2017)	14	phs001089.v4.p1:SL202096	proband	NDD	2	Sequel II (CCS)	TRUE	TRUE
HALB3031997	m84139_230926_201031_s2	CSER1 (Bowling 2017)	N/A	phs001089.v4.p1:SL293678	proband	NDD,myopathy	1	REVIO	TRUE	TRUE
HALB3031996	m84139_230926_193958_s1	CSER1 (Bowling 2017)	15	phs001089.v4.p1:SL244904	proband	NDD,myopathy	1	REVIO	TRUE	TRUE
HALB3032107	m64233e_210524_045952,m64234e_210524_044355	AGHI (East 2021)	16	N/A	proband	NDD	2	Sequel II (CCS)	FALSE	TRUE
HALB3032000	m84053_231004_164046_s4	AGHI (East 2021)	N/A	N/A	proband	NDD,myopathy	1	REVIO	TRUE	TRUE
HALB3032001	m84139_231004_153119_s2	AGHI (East 2021)	N/A	N/A	proband	NDD,myopathy	1	REVIO	TRUE	TRUE
HALB3032002	m84139_231004_160225_s3,m84053_231030_213551_s2.hifi_reads.bc2041	AGHI (East 2021)	N/A	N/A	proband	NDD,myopathy	2	REVIO	TRUE	TRUE
HALB3032003	m84139_231004_163331_s4	AGHI (East 2021)	N/A	N/A	proband	NDD,myopathy	1	REVIO	TRUE	TRUE
HALB3032006	m84139_231005_194015_s3,m84053_231030_213551_s2.hifi_reads.bc2045	AGHI (East 2021)	N/A	N/A	proband	myopathy	2	REVIO	TRUE	TRUE
HALB3032009	m84139_231115_202942_s3	SouthSeq (Bowling 2022)	N/A	phs002307.v1.p1:HALB3004858	proband	NDD,myopathy	1	REVIO	TRUE	TRUE
